# Supplementary material for: Genetic analysis of intestinal polyp development in Collaborative Cross mice carrying the ApcMin/+ mutation
Source: PubMed Central journal article supplement (PMC4761170; doi:10.1186/s12863-016-0349-6), 2016-02-19

**Table 1S:** Summary of all generated progeny, divided by gender & *Min* carriers

|               | <b>Total<br/>progeny</b> | <b>Males</b> | <b>Females</b> | <b>Total<br/><i>Min</i><br/>carriers</b> | <b>Males</b> | <b>Females</b> |
|---------------|--------------------------|--------------|----------------|------------------------------------------|--------------|----------------|
| <b>IL188</b>  | 13                       | 7            | 6              | 5                                        | 3            | 2              |
| <b>IL519</b>  | 13                       | 6            | 7              | 5                                        | 3            | 2              |
| <b>IL521</b>  | 22                       | 15           | 7              | 9                                        | 7            | 2              |
| <b>IL557</b>  | 4                        | 3            | 1              | 1                                        | 0            | 1              |
| <b>IL611</b>  | 8                        | 2            | 6              | 3                                        | 0            | 3              |
| <b>IL670</b>  | 5                        | 3            | 2              | 3                                        | 3            | 0              |
| <b>IL785</b>  | 14                       | 8            | 6              | 7                                        | 5            | 2              |
| <b>IL1052</b> | 12                       | 5            | 7              | 5                                        | 2            | 3              |
| <b>IL1300</b> | 31                       | 13           | 18             | 15                                       | 7            | 8              |
| <b>IL1488</b> | 13                       | 8            | 5              | 8                                        | 5            | 3              |
| <b>IL1513</b> | 19                       | 5            | 14             | 10                                       | 2            | 8              |
| <b>IL1912</b> | 9                        | 5            | 4              | 4                                        | 2            | 2              |
| <b>IL2126</b> | 18                       | 7            | 11             | 10                                       | 4            | 6              |
| <b>IL2156</b> | 19                       | 9            | 10             | 9                                        | 3            | 6              |
| <b>IL2439</b> | 13                       | 7            | 6              | 6                                        | 3            | 3              |
| <b>IL2513</b> | 11                       | 7            | 4              | 3                                        | 3            | 0              |
| <b>IL2573</b> | 29                       | 13           | 16             | 15                                       | 7            | 8              |
| <b>IL2680</b> | 12                       | 4            | 8              | 5                                        | 1            | 4              |
| <b>IL2750</b> | 13                       | 10           | 3              | 7                                        | 6            | 1              |
| <b>IL3348</b> | 15                       | 9            | 6              | 6                                        | 4            | 2              |
| <b>IL3438</b> | 14                       | 3            | 11             | 6                                        | 1            | 5              |
| <b>IL3575</b> | 16                       | 9            | 7              | 5                                        | 2            | 3              |
| <b>IL3738</b> | 8                        | 5            | 3              | 3                                        | 3            | 0              |
| <b>IL3912</b> | 8                        | 2            | 6              | 3                                        | 0            | 3              |
| <b>IL4052</b> | 6                        | 1            | 5              | 2                                        | 0            | 2              |
| <b>IL4141</b> | 24                       | 15           | 9              | 8                                        | 6            | 2              |
| <b>IL4457</b> | 34                       | 19           | 15             | 16                                       | 9            | 7              |
| <b>Total</b>  | 403                      | 200          | 203            | 179                                      | 91           | 88             |

**Figure 1S.** Intestinal length (cm) ( $\pm$ SE). The X-axis represents CC lines, C57BL/6 strain carrying the *Apc*<sup>Min/+</sup> mutation (first black column) and CC-Mean (black column ~ in the middle), while the Y-axis centimeter. One-way ANOVA performed for statistical analysis,  $p < 0.05$ .

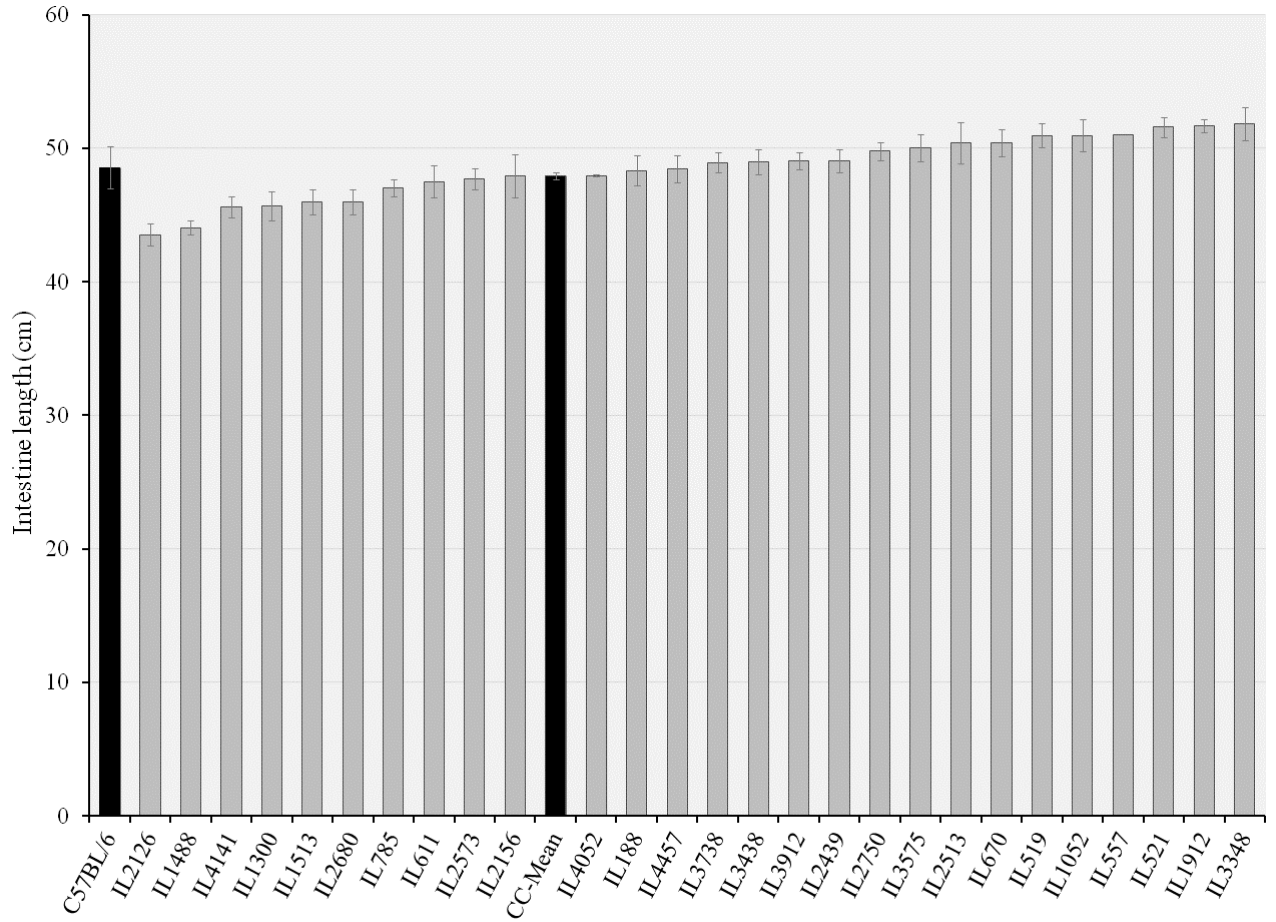

**Figure 2S.** Number of polyps per cm ( $\pm$ SE). The X-axis represents CC lines, C57BL/6 strain carrying the *Apc*<sup>Min/+</sup> mutation (first black column) and CC-Mean (black column ~ in the middle), while the Y-axis is number of polyps. One-way ANOVA performed for statistical analysis,  $p < 0.05$ .

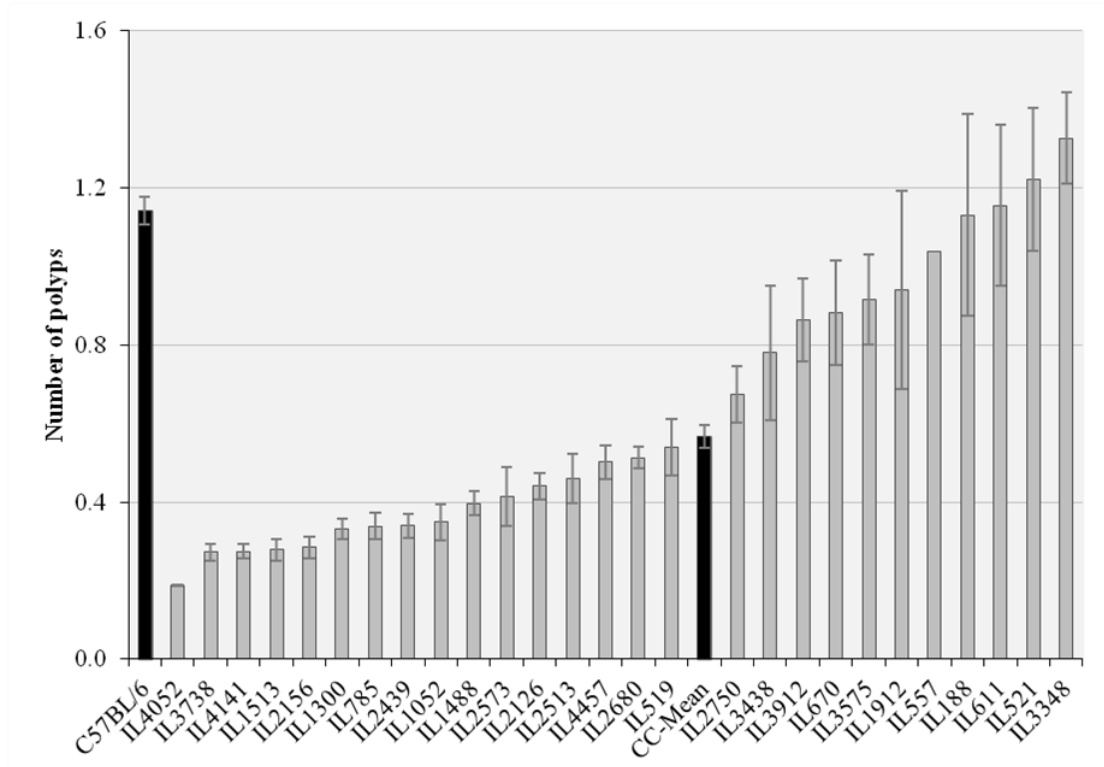

**Figure 3S.** Frequency of lines as for the number of polyps per cm. The X-axis represents number of polyps per cm, while the Y-axis is the frequency. Number inside each column is the number of CC lines within each range of polyps.

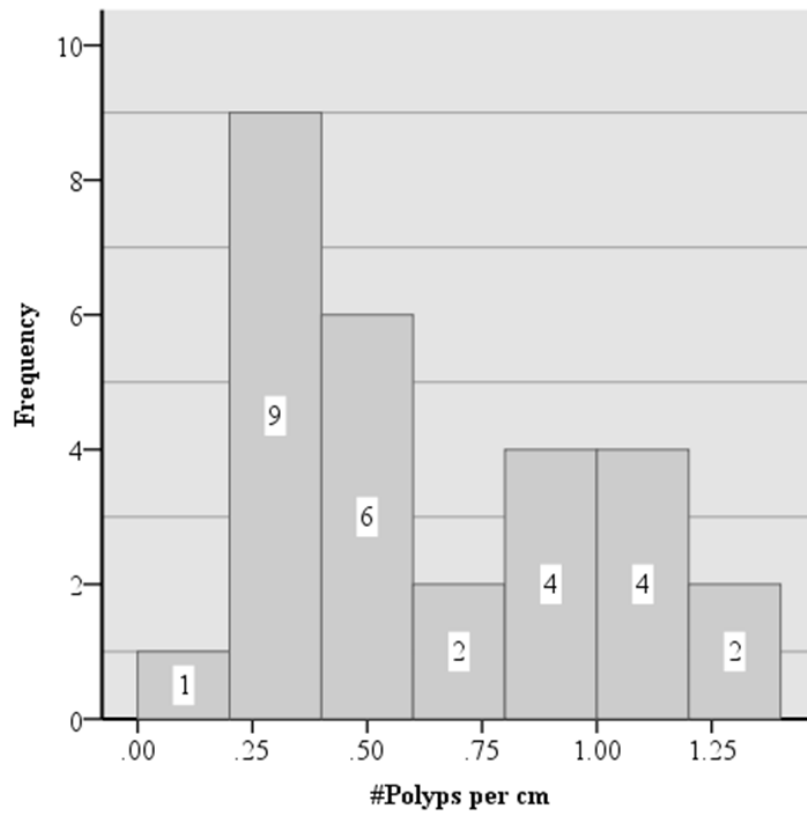

**Figure 4S.** Intestine % Weight ( $\pm$ SE). The X-axis represents CC lines, C57BL/6 strain carrying the *Apc<sup>Min/+</sup>* mutation (first black column) and CC-Mean (black column ~ in the middle), while the Y-axis % Weight. One-way ANOVA performed for statistical analysis,  $p < 0.05$ .

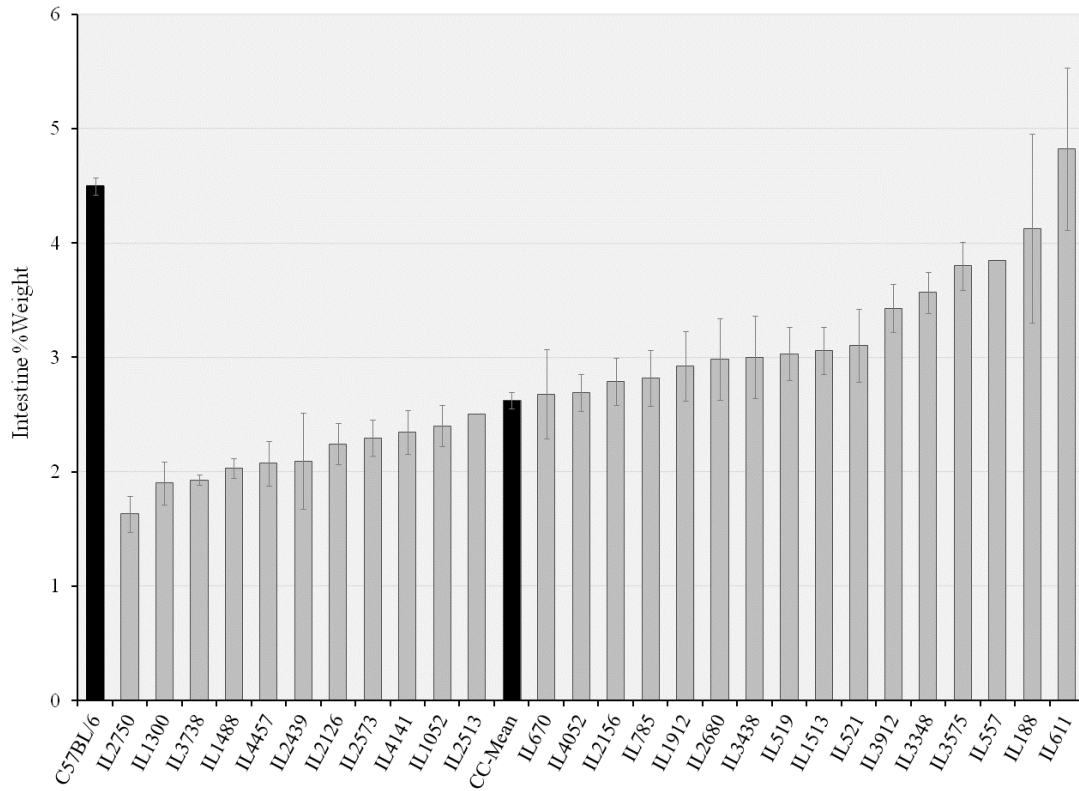

**Figure 5S.** %PCV ( $\pm$ SE). The X-axis represents CC lines, C57BL/6 strain carrying the *Apc*<sup>Min/+</sup> mutation (first black column) and CC-Mean (black column ~ in the middle), while the Y-axis %. One-way ANOVA performed for statistical analysis,  $p < 0.05$ .

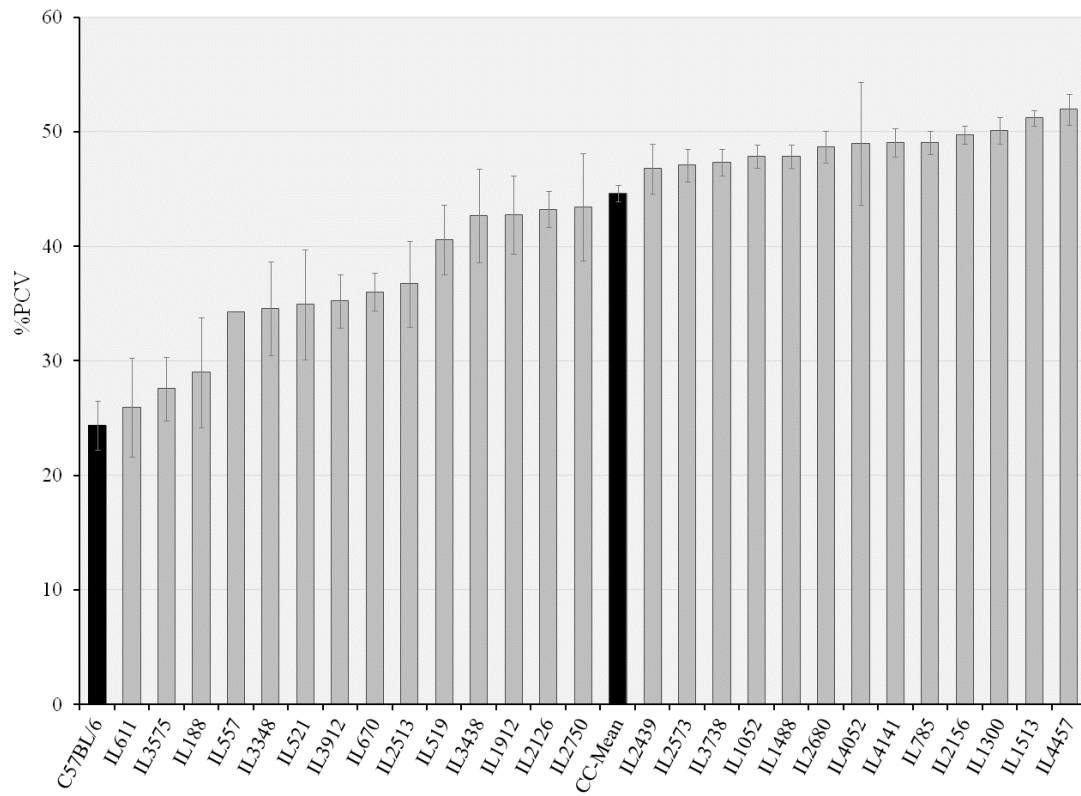

**Figure 6S.** Spleen % Weight ( $\pm$ SE). The X-axis represents CC lines, C57BL/6 strain carrying the *Apc*<sup>Min/+</sup> mutation (first black column) and CC-Mean (black column ~ in the middle), while the Y-axis % Weight. One-way ANOVA performed for statistical analysis,  $p < 0.05$ .

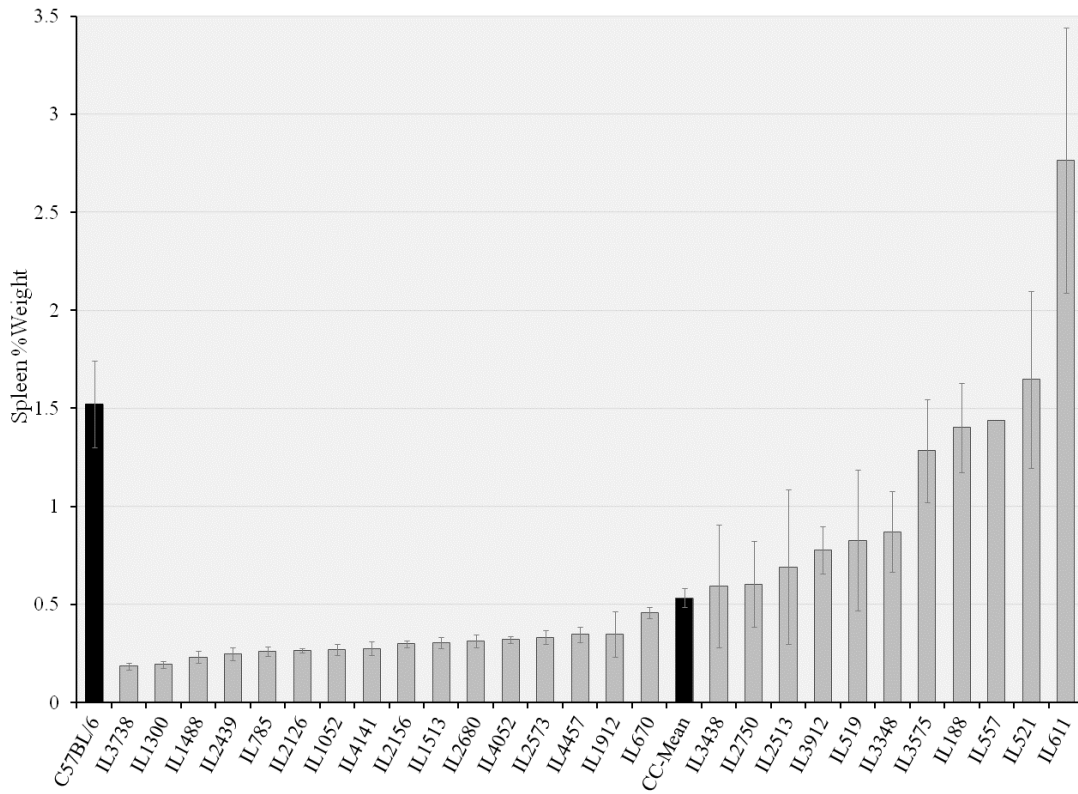

**Figure 7S.** Average number of polyps ( $\pm$ SE) in 22 F1 CC-C57BL/6-*Min* lines (n= 1-16 mice/line) based on male and female. The X-axis represents male and female of each studied CC line, while the Y-axis number of polyps.

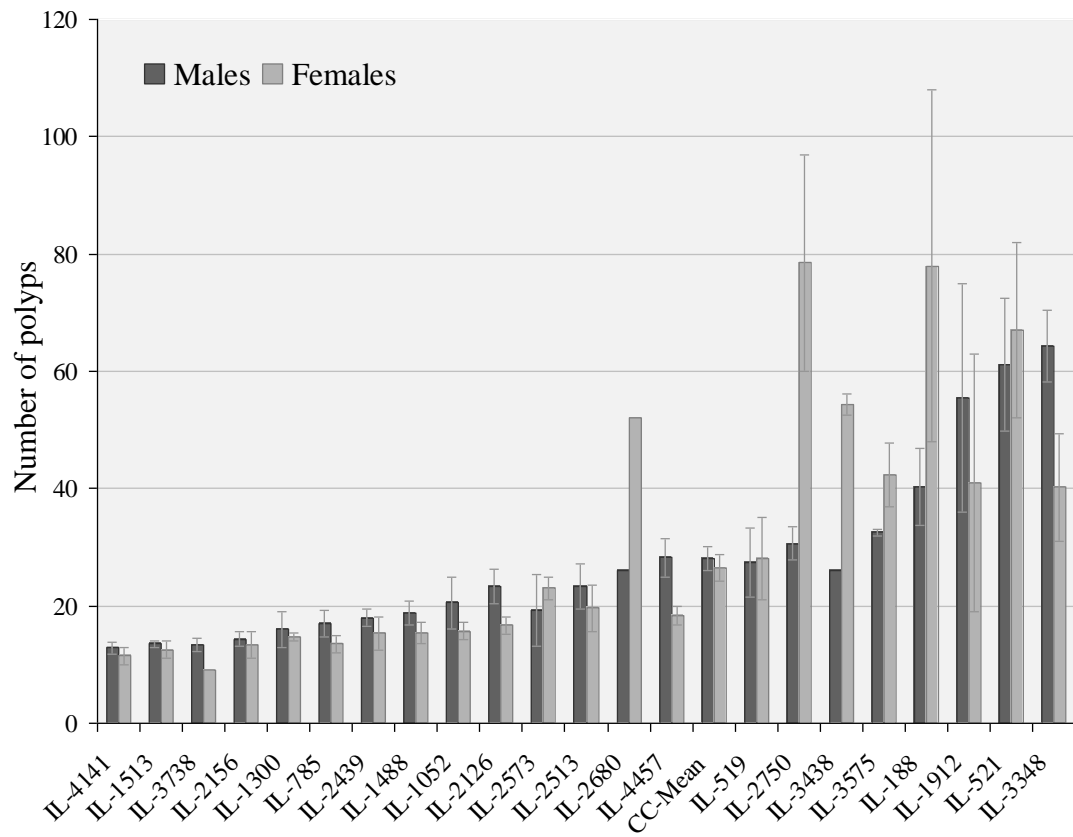

Supplement: 12863_2016_349_MOESM1_ESM.pdf [file 12863_2016_349_MOESM1_ESM.pdf]
